# Supplementary material for: Graphene and graphene oxide double decorated SnO2 nanofibers with enhanced humidity sensing performance
Source: Royal Society of Chemistry journal article supplement (doi:10.1039/c5ra10571d), 2015-01-01
Supplement: c5ra10571d1.pdf [file c5ra10571d1.pdf]

## Graphene and Graphene Oxide Double Decorated SnO<sub>2</sub> Nanofibers with Enhanced Humidity Sensing Performance

Jing Xu<sup>1</sup>, Shaozhen Gu<sup>2</sup>, Bingan Lu<sup>2\*</sup>

<sup>1</sup>College of Material science and engineering, Hunan University, Changsha, 410082, China.

<sup>2</sup>School of Physics and Electronics, Hunan University, Changsha, 410082, China.

Figure S1

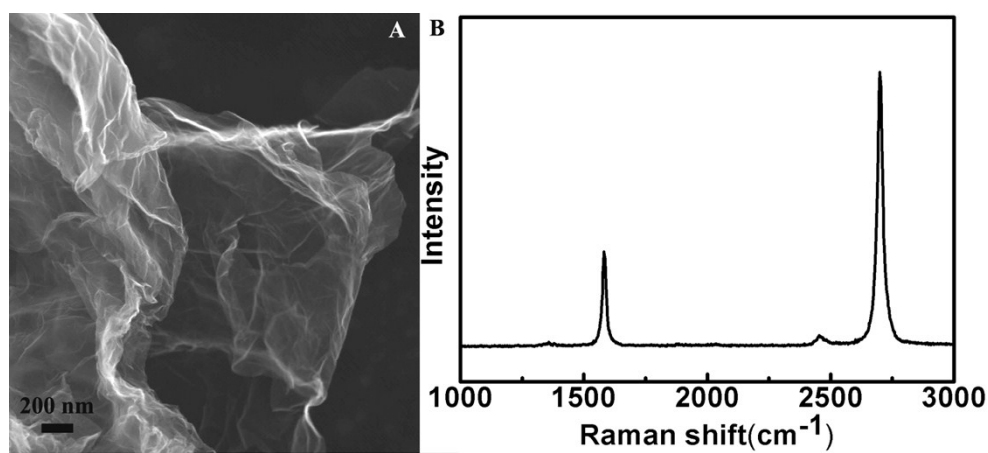

**Figure S1** (A) SEM images of graphene. (B) Raman spectra of graphene.

Fig S2

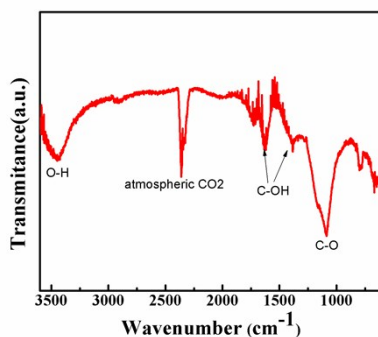

**Figure S2** shows the typical FTIR spectrum of GO sheets. The spectrum presence of different type of oxygen functionalities in graphene oxide was confirmed at 3400 cm<sup>-1</sup>

(O-H stretching vibrations), at 1720 and 1576  $\text{cm}^{-1}$  (stretching vibrations from C–OH vibrations from COOH and  $\text{H}_2\text{O}$ ), and at 1060  $\text{cm}^{-1}$  (C–O stretching vibrations). The peaks at  $\sim 2336 \text{ cm}^{-1}$  is due to atmospheric  $\text{CO}_2$ .

Fig S3

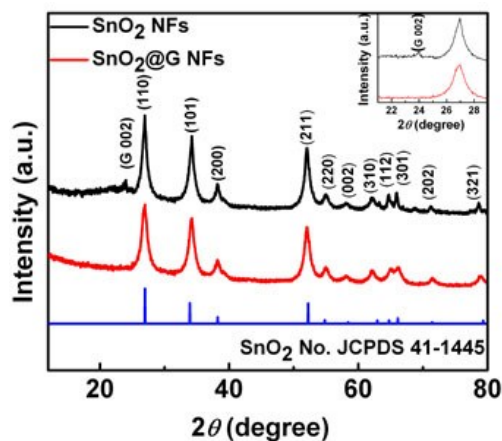

**Figure S3** The XRD patterns of pure  $\text{SnO}_2$  and  $\text{SnO}_2@\text{G}$  composites. For  $\text{SnO}_2$  nanofibers, all the peaks can be readily indexed to the rutile phase  $\text{SnO}_2$  (JCPDS No. 41-1445). Compared to pure  $\text{SnO}_2$  nanofibers, in the XRD pattern of  $\text{SnO}_2@\text{G}$  nanofibers, the appearance of a broadened peak at  $24^\circ$  (inset) corresponding to the (002) of graphite indicates the existence of graphene.

Figure S4

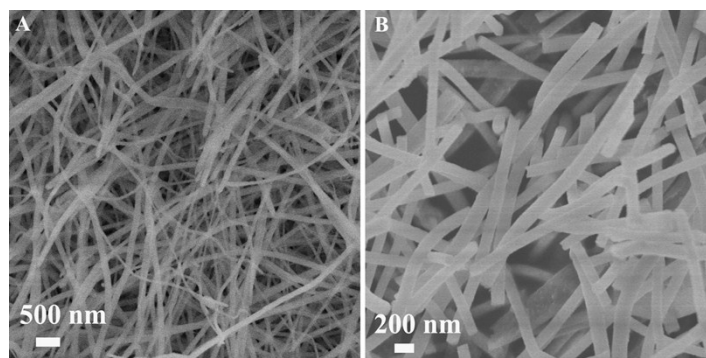

**Figure S4** (A) SEM images of as-spun SnO<sub>2</sub>@G nanofibers, and (B) SEM images of SnO<sub>2</sub>@G nanofibers after annealing.

Fig S5

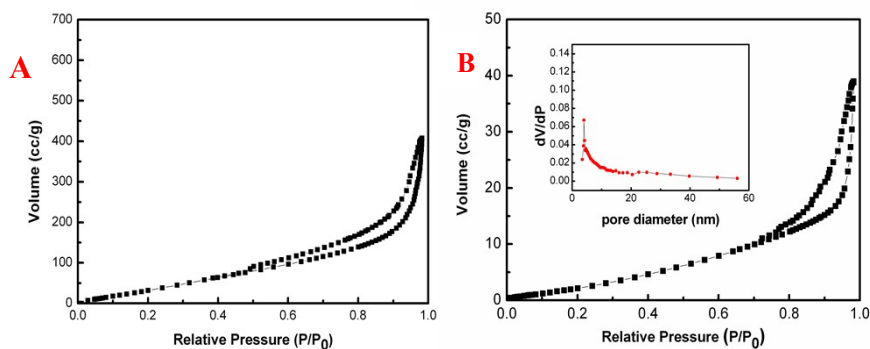

**Figure S5** (A) Nitrogen adsorption/desorption isotherms of the SnO<sub>2</sub>@G-GO nanocomposite. The specific surface area of the SnO<sub>2</sub>@G-GO nanocomposite is 193.62 m<sup>2</sup> g<sup>-1</sup>. (B) Nitrogen adsorption/desorption isotherms of the SnO<sub>2</sub>@G nanofibers. The specific surface area of the SnO<sub>2</sub>@G nanofibers is 29.34 m<sup>2</sup> g<sup>-1</sup>. The pore diameter is about 3.8nm.

Fig S6

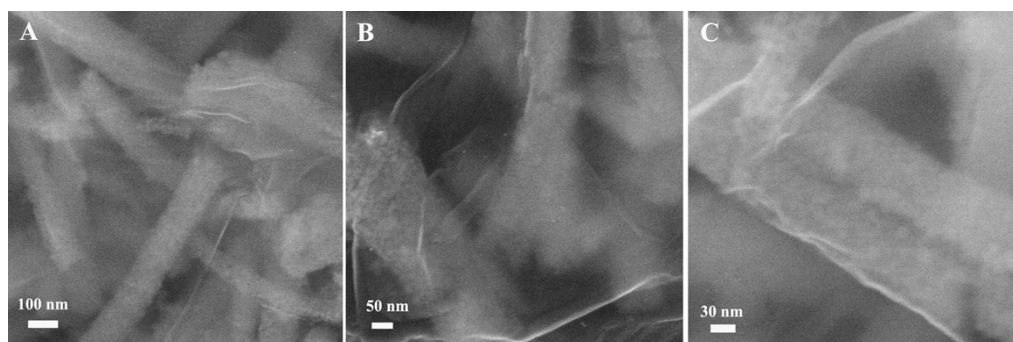

**Figure S6** SEM images of SnO<sub>2</sub>@G-GO. The SnO<sub>2</sub>@G hybrid nanofibers were apparently wrapped by the well-stretched GO.

Figure S7

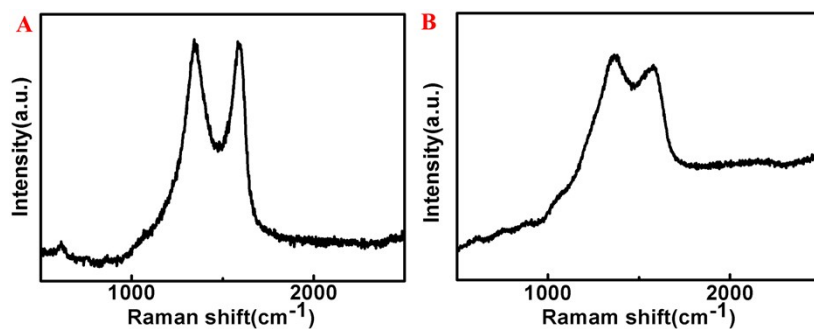

**Figure S7** Raman spectra of (A) SnO<sub>2</sub>@G nanofibers, and (B) SnO<sub>2</sub>@G-GO nanocomposite.

Figure 8

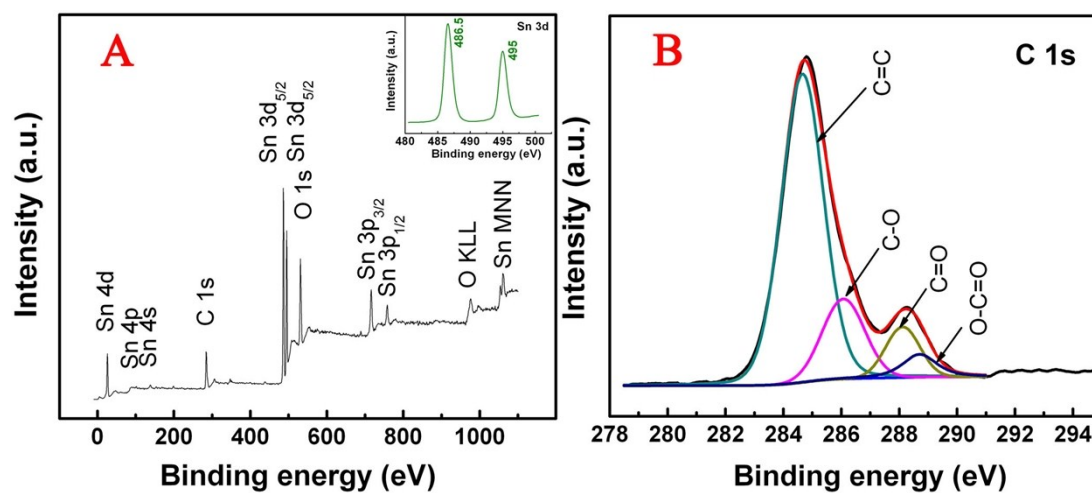

**Figure S8** XPS spectra of the SnO<sub>2</sub>@G-GO nanocomposites (A); insets: the Sn 3d doublet; (B) the C 1s XPS spectrum of the graphene and GO.
